# Supplementary material for: Mechanism of N,N-dimethylformamide electrochemical oxidation using a Ti/RuO2–IrO2 electrode
Source: Royal Society of Chemistry journal article supplement (doi:10.1039/d0ra10181h), 2021-01-01
Supplement: d0ra10181h1.pdf [file d0ra10181h1.pdf]

## **Supplementary Material**

### **Mechanism of N,N-dimethylformamide Electrochemical Oxidation**

#### **Using Ti/RuO<sub>2</sub>-IrO<sub>2</sub> Electrode**

Xuyang Hu<sup>a</sup>, Hao Dong<sup>a</sup>, Yinghao Zhang<sup>a</sup>, Baihui Fang<sup>a</sup>, Wenqiang Jiang<sup>a, \*</sup>

<sup>a</sup> School of Environmental Science and Engineering, Qilu University of Technology

(Shandong Academy of Sciences), Ji'nan 250353, China

\* Corresponding author: Wenqiang Jiang

E-mail address: [jwq@qlu.edu.cn](mailto:jwq@qlu.edu.cn)

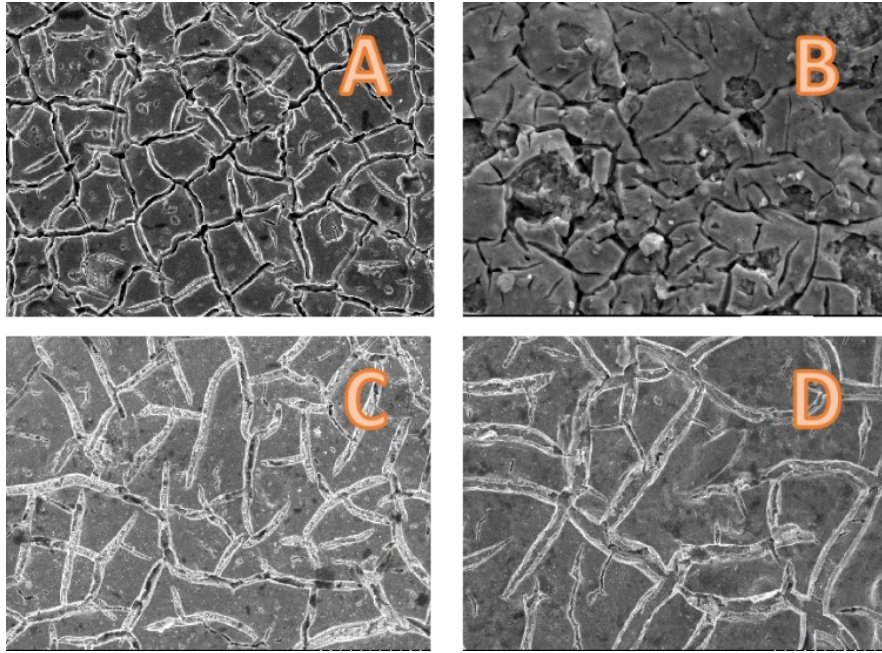

Figure S1 – SEM images of  $\text{Ti/RuO}_2\text{-IrO}_2$  (A),  $\text{Ti/RuO}_2\text{-IrO}_2\text{-SnO}_2$  (b),  $\text{Ti/Ta}_2\text{O}_5\text{-IrO}_2$  (C), and  $\text{Ti/IrO}_2\text{-Ta}_2\text{O}_5\text{-SnO}_2$  (D).

---
